# Supplementary material for: Association of Allostatic Load and All Cancer Risk in the SWAN Cohort
Source: MDPI journal article supplement (doi:10.3390/cancers14133044), 2022-06-21
Supplement: s1 [file s1]

Table S1. List of cancer cases.

| Site     | Number | Percentage | Cumulative Percentage |
|----------|--------|------------|-----------------------|
| Bone     | 1      | 0.62       | 0.62                  |
| Brain    | 2      | 1.24       | 1.86                  |
| Breast   | 77     | 47.83      | 49.69                 |
| Cervix   | 12     | 7.45       | 57.14                 |
| Colon    | 7      | 4.35       | 61.49                 |
| Kidney   | 3      | 1.86       | 63.35                 |
| Leukemia | 4      | 2.48       | 65.84                 |
| Liver    | 1      | 0.62       | 66.46                 |
| Lung     | 4      | 2.48       | 68.94                 |
| Melanoma | 1      | 0.62       | 69.57                 |
| Other    | 22     | 13.66      | 83.23                 |
| Ovary    | 7      | 4.35       | 87.58                 |
| Rectal   | 1      | 0.62       | 88.2                  |
| Skin     | 2      | 1.24       | 89.44                 |
| Throat   | 6      | 3.73       | 93.17                 |
| Uterus   | 10     | 6.21       | 99.38                 |
| liver    | 1      | 0.62       | 100                   |
| Total    | 161    | 100        |                       |
